# Supplementary material
Source: PubMed Central journal article supplement (PMC1913729)
Supplement: plntcell_tpc.106.042903_2.pdf [file plntcell_tpc.106.042903_2.pdf]

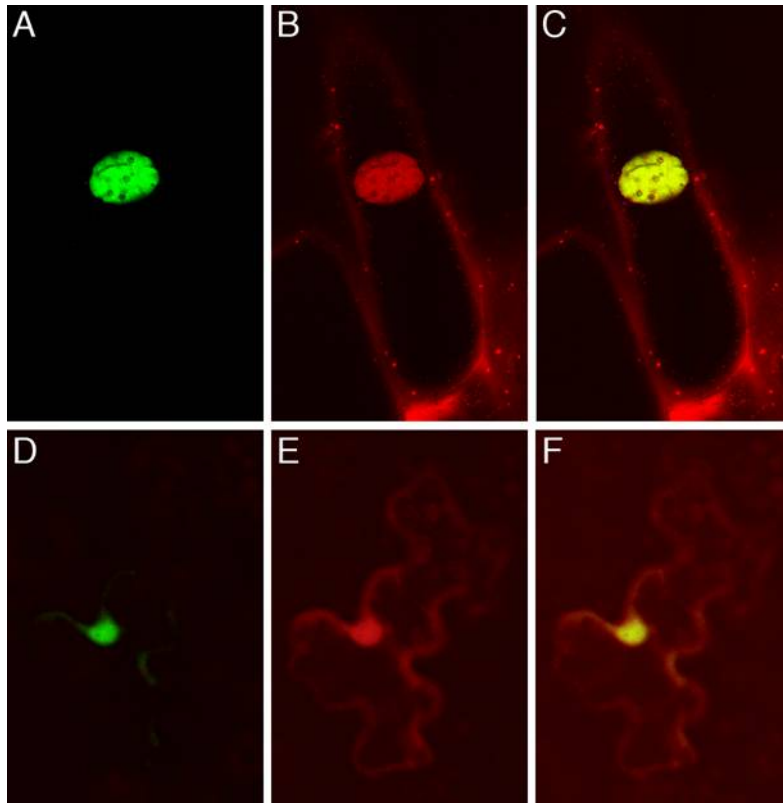

**Supplemental Figure S2.** Nuclear localization of GFP-At VIP2 in plant cells (**A, D**) *GFP-At VIP2*. (**B, E**) Free DsRed2 produced from the *pGDR-GFP-At VIP2*-expressing construct. (**C, F**) Merged images. Panels A-C and D-F show expression in onion and tobacco cells, respectively. GFP is in green, DsRed2 is in red, and overlapping GFP and DsRed2 are in yellow. All images are single confocal sections.
