# Supplementary material
Source: PubMed Central journal article supplement (PMC1913729)
Supplement: plntcell_tpc.106.042903_4.pdf [file plntcell_tpc.106.042903_4.pdf]

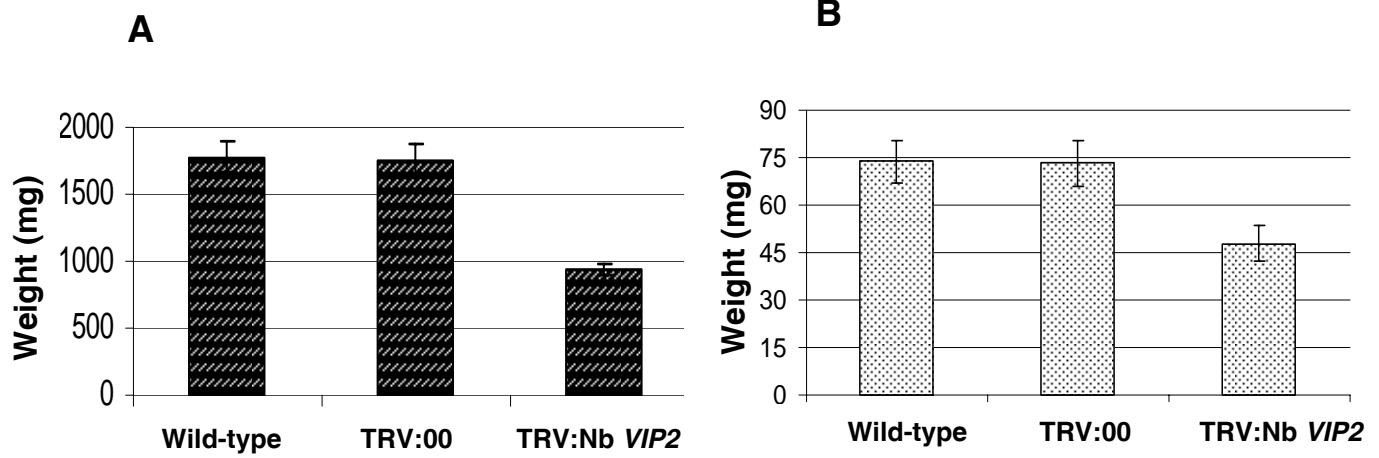

**Supplemental Figure S4.** Quantification of tumors in Nb *VIP2* silenced plants. Three weeks post-TRV inoculation, equal number of leaf discs from Nb *VIP2* silenced plants, TRV::00 infected plants and wild-type *N. benthamiana* plants were inoculated with the oncogenic strain A348, and allowed to produce leaf tumors on a basal selection media with antibiotics. The fresh (A) and dry (B) weight of tumors incited on the leaf discs were quantified 4-wks post *Agrobacterium* inoculation.
