# Supplementary material
Source: PubMed Central journal article supplement (PMC1913729)
Supplement: plntcell_tpc.106.042903_5.pdf [file plntcell_tpc.106.042903_5.pdf]

**A**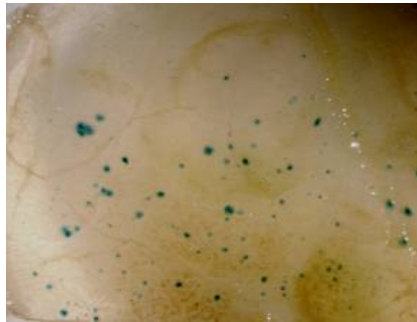**TRV:00**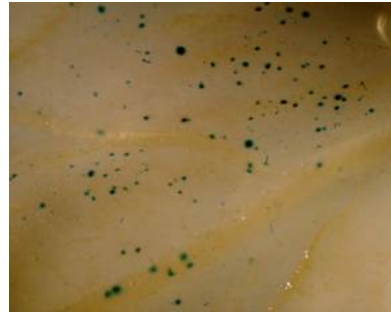**TRV:Nb *VIP2*****B**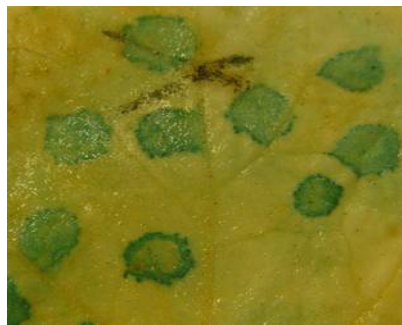**TRV:00**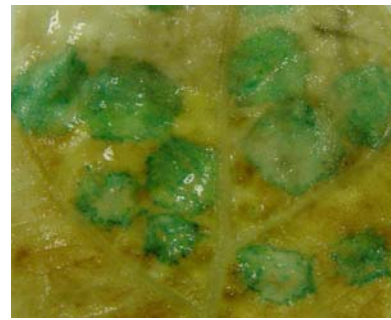**TRV:Nb *VIP2***

**Supplemental Figure S5.** Nb *VIP2* silenced plants can also be transiently transformed by alternate methods. A) Transient expression of GUS by particle bombardment in Nb *VIP2* silenced and TRV:00 inoculated leaves of *N. benthamiana*. Leaves from the Nb *VIP2* silenced plants and TRV:00 inoculated plants were biolistically transformed with a plant transformation vector pAHC20 carrying 35S:*gus* cassette. The transformed leaves were stained for GUS reporter gene expression 48 h after bombardment. No qualitative differences were observed in the number of GUS spots detected on the Nb *VIP2* silenced and TRV:00 infected plants. B) Transient GUS expression in the Nb *VIP2* silenced and TRV:00 inoculated leaves of *N. benthamiana*. Three weeks post-TRV inoculation the Nb *VIP2* silenced and TRV:00 leaves were agro-infiltrated (using a needle-less syringe) with a strain *A. tumefaciens* GV2260 containing the binary vector pBISN1 (containing on its T-DNA a *uidA*-intron gene). The infiltrated leaves were collected three days post infiltration and stained with X-Gluc. No qualitative differences were observed for transient GUS expression in the Nb *VIP2* silenced plants and TRV:00 inoculated plants.
