# Supplementary material
Source: PubMed Central journal article supplement (PMC1913729)
Supplement: plntcell_tpc.106.042903_6.pdf [file plntcell_tpc.106.042903_6.pdf]

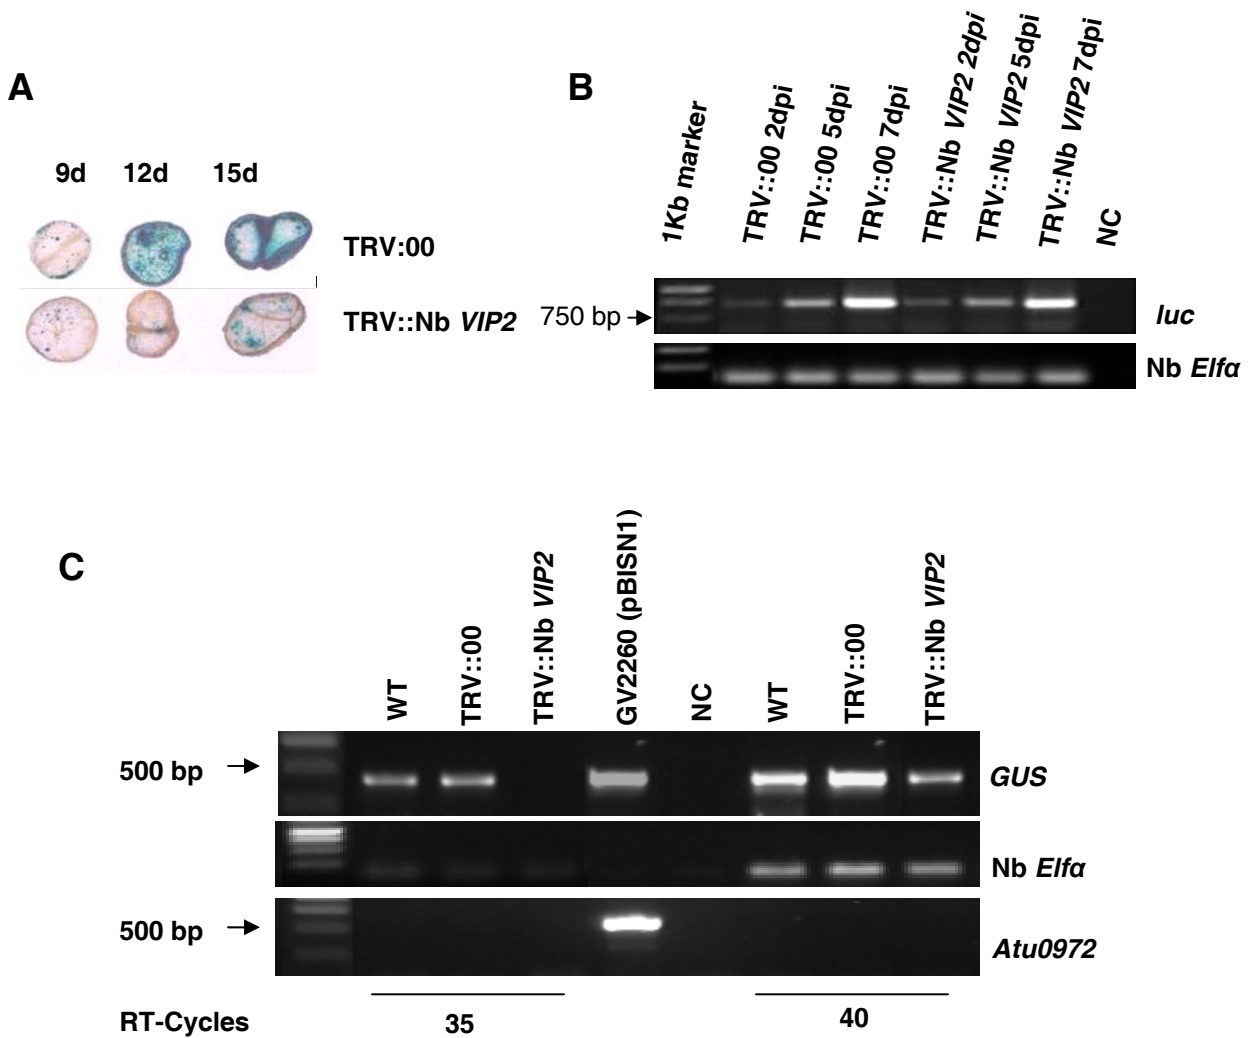

**Supplemental Figure S6.** T-DNA integration assay. **(A)** The leaf disks from TRV:00 plants and Nb *VIP2* silenced plants were inoculated with a disarmed strain *A. tumefaciens* GV2260 containing the binary vector pKM1 with a promoterless *gusA*-intron gene and 35S::*luc*-intron gene within the T-DNA. Leaf disks were periodically collected and stained with X-Gluc for GUS expression **(B)** Expression of the *luc* gene in the same leaf disks inoculated with strain GV2260 containing the binary vector pKM1 for Nb *VIP2* silenced and TRV::00 inoculated plants by semi-quantitative RT-PCR. **(C)** Semi-quantitative PCR analyses to determine the amount of integrated T-DNA. The leaf disks derived from Nb *VIP2* silenced plants and TRV:00 inoculated *N. benthamiana* plants were infected with strain GV2260 harboring the binary vector pBISN1. The inoculated leaf disks were incubated in CIM without any selection and were collected at 21 dpi. DNA was isolated from the calli and was PCR amplified with primers specific to *GUS* or *elongation factor α* (Nb *Elfa*) or an *Agrobacterium* gene (*Atu0972*). WT, Wild-type; NC, no template control.
