# Supplementary material
Source: PubMed Central journal article supplement (PMC1913729)
Supplement: plntcell_tpc.106.042903_7.pdf [file plntcell_tpc.106.042903_7.pdf]

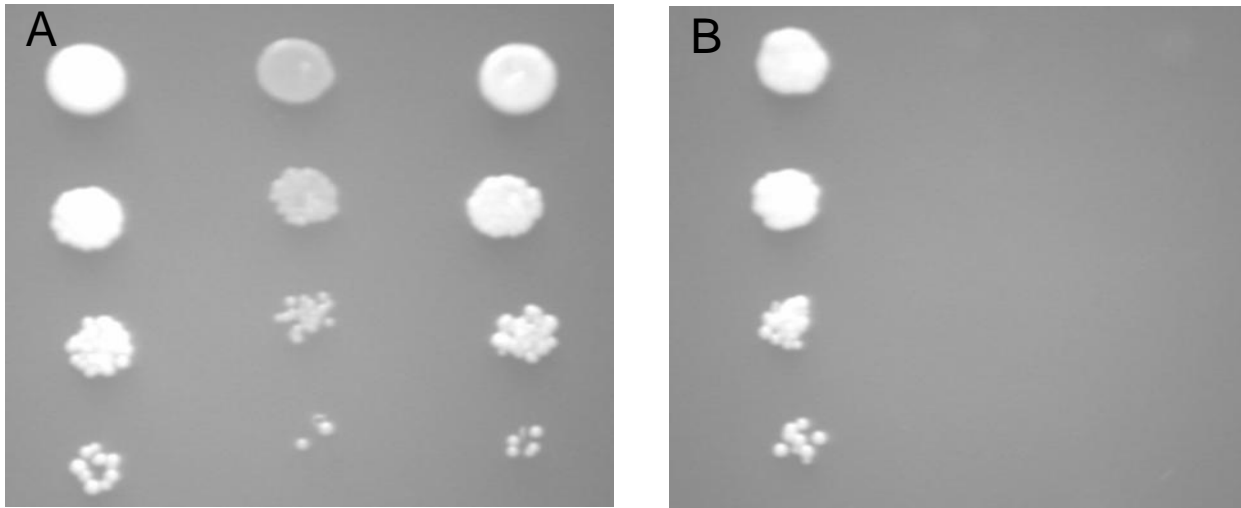

**Supplemental Figure S7.** Specific Nb VIP2-VirE2 interaction in the yeast two-hybrid system. Yeast shown in panel A were grown on double dropout (-Leu/-Trp) plates. Yeast shown in panel B were grown on triple dropout (-Leu/-Trp/-His) plates. Both plate types contain the following plasmids combinations from left to right: pSTT-*VirE2*::pGAD-Nb *VIP2*; pSTT-*LaminC*::pGAD-Nb *VIP2*; pSTT-*TOPI*::pGAD-Nb *VIP2*. Growth of yeast bearing pSTT-*VirE2*::pGAD-Nb *VIP2*, and absence of growth of pSTT-*LaminC*::pGAD-Nb *VIP2* and pSTT-*TOPI*::pGAD-Nb *VIP2* bearing yeast, on the triple dropout plates indicate specific interaction between VirE2 and Nb VIP2.
