# Supplementary material
Source: PubMed Central journal article supplement (PMC1913729)
Supplement: plntcell_tpc.106.042903_8.pdf [file plntcell_tpc.106.042903_8.pdf]

### Functional Categorization by Annotations for : GO Molecular Function

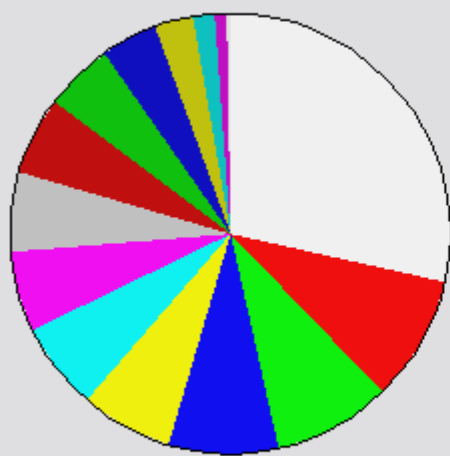

|                                |                            |
|--------------------------------|----------------------------|
| other molecular functions:     | 28.7% ( raw value = 1446 ) |
| other enzyme activity:         | 9.2% ( raw value = 463 )   |
| hydrolase activity:            | 8.7% ( raw value = 436 )   |
| transferase activity:          | 8.1% ( raw value = 406 )   |
| protein binding:               | 7.1% ( raw value = 356 )   |
| other binding:                 | 6.4% ( raw value = 321 )   |
| transporter activity:          | 6% ( raw value = 300 )     |
| DNA or RNA binding:            | 5.8% ( raw value = 290 )   |
| kinase activity:               | 5.7% ( raw value = 289 )   |
| transcription factor activity: | 4.9% ( raw value = 245 )   |
| nucleotide binding:            | 4.2% ( raw value = 211 )   |
| structural molecule activity:  | 2.7% ( raw value = 134 )   |
| nucleic acid binding:          | 1.7% ( raw value = 87 )    |
| receptor binding or activity:  | 1% ( raw value = 48 )      |

**Supplemental Figure S8:** Classification of the 4241 differentially expressed genes between wild-type Col-0 and *At vip2* on the basis of their molecular functions
