# Supplementary material
Source: PubMed Central journal article supplement (PMC1913729)
Supplement: plntcell_tpc.106.042903_9.pdf [file plntcell_tpc.106.042903_9.pdf]

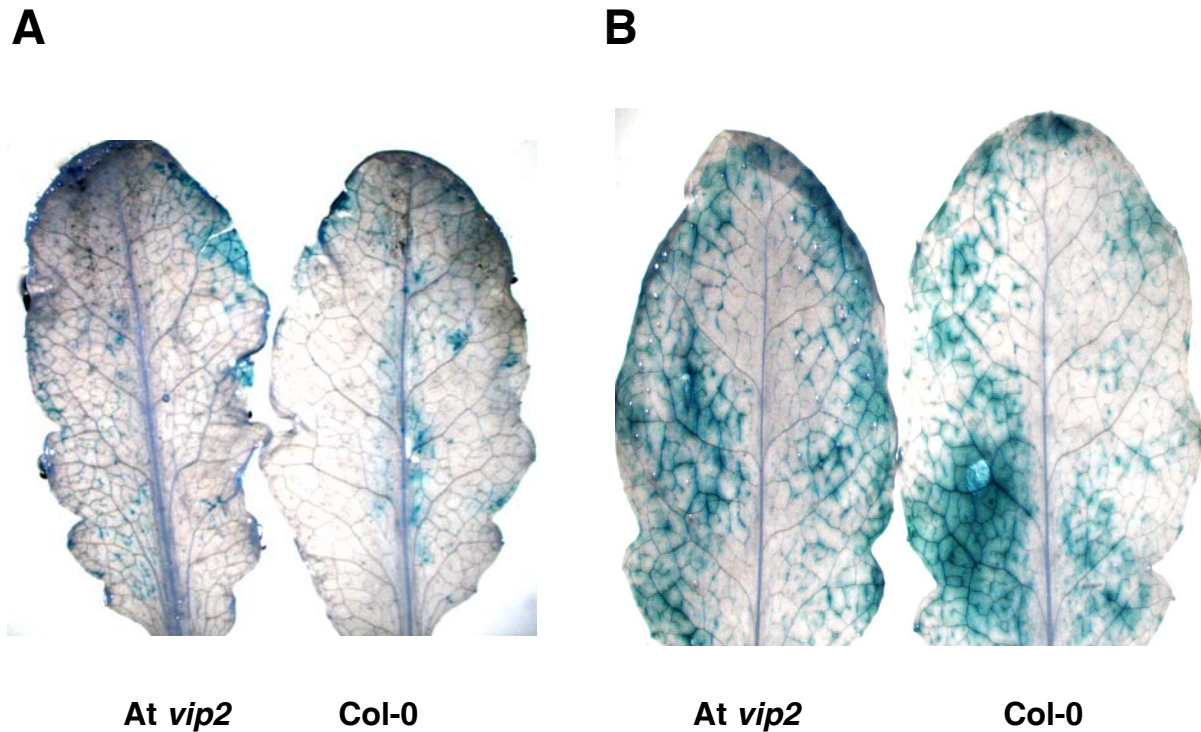

**Supplemental Figure S9.** Transient expression of *uidA*-intron gene in leaves of Arabidopsis plants transformed with At804 for transcriptome analyses. Leaves of Col-0 and At *vip2* were agro-infiltrated (using a needle-less syringe) with *A. tumefaciens* GV3101 containing the binary vector pBISN1 (containing on its T-DNA a *uidA*-intron gene, At804). The infiltrated leaves were collected 42 hr (A) and 72 hr post infection (B) and stained with X-Gluc. No qualitative differences were observed for transient GUS expression in the At *vip2* and Col-0 plants. We used similarly infected leaves to compare the expression profile of At *vip2* and Col-0 in response to *Agrobacterium* infection.
